# Supplementary material for: The characteristics and prognostic role of acute abdominal on‐admission pain in acute pancreatitis: A prospective cohort analysis of 1432 cases
Source: PubMed Central journal article supplement — Eur J Pain. 2021 Nov 16;26(3):610–23. doi: 10.1002/ejp.1885 (PMC9299627; doi:10.1002/ejp.1885), 2021-11-16
Supplement: EJP-26-610-s001.pdf [file EJP-26-610-s001.pdf]

## Supplementary Figure 1 – Centre distribution

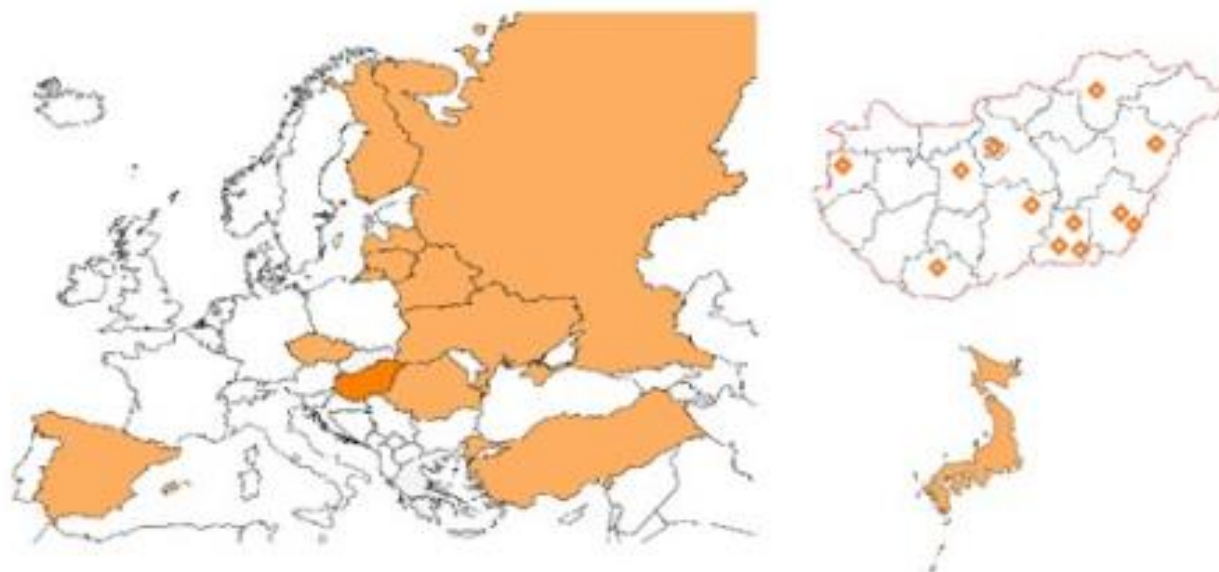

| <b>Acute Pancreatitis Registry Centers</b> |                                                                       |                                                                  |                 |
|--------------------------------------------|-----------------------------------------------------------------------|------------------------------------------------------------------|-----------------|
| Country                                    | City                                                                  | Institute                                                        | No. of patients |
| Hungary                                    | Pécs                                                                  | First Department of Medicine, Medical School, University of Pécs | 363             |
|                                            | Szeged                                                                | First Department of Medicine, University of Szeged               | 247             |
|                                            |                                                                       | Second Department of Medicine, University of Szeged              | 36              |
|                                            |                                                                       | Department of Emergency, University of Szeged                    | 10              |
|                                            |                                                                       | Department of Surgery, University of Szeged                      | 4               |
|                                            | Székesfehérvár                                                        | Szent György Teaching Hospital of County Fejér                   | 199             |
|                                            | Budapest                                                              | Bajcsy-Zsilinszky Hospital                                       | 138             |
|                                            |                                                                       | Polyclinic of Hospitaller Brothers of Saint John of God          | 5               |
|                                            |                                                                       | Heim Pál National Institute of Pediatrics                        | 1               |
|                                            |                                                                       | Military Hospital                                                | 1               |
|                                            | Debrecen                                                              | Department of Internal Medicine, University of Debrecen          | 76              |
|                                            |                                                                       | Institute of Surgery, University of Debrecen                     | 7               |
|                                            | Békéscsaba                                                            | Dr. Réthy Pál Hospital                                           | 54              |
| Gyula                                      | Pándy Kálmán Hospital                                                 | 27                                                               |                 |
| Szentes                                    | Dr. Bugyi István Hospital                                             | 16                                                               |                 |
| Miskolc                                    | Borsod-Abaúj-Zemplén County Hospital and University Teaching Hospital | 14                                                               |                 |
| Kecskemét                                  | Bács-Kiskun County Hospital                                           | 11                                                               |                 |
| Makó                                       | Healthcare Center of County Csongrád                                  | 10                                                               |                 |
| Szombathely                                | Markusovszky University Teaching Hospital                             | 9                                                                |                 |
| Romania                                    | Targu Mures                                                           | Mures County Emergency Hospital                                  | 41              |
| Lithuania                                  | Vilnius                                                               | Vilnius University Hospital Santariskiu Klinikos                 | 31              |
| Spain                                      | Barcelona                                                             | Consorci Sanitari del Garraf, sant Pere de Ribes                 | 30              |
| Finland                                    | Helsinki                                                              | Helsinki University Hospital                                     | 27              |
| Turkey                                     | Istanbul                                                              | Hospital of Bezmialem Vakif University                           | 20              |
| Russia                                     | St. Petersburg                                                        | Saint Luke Clinical Hospital                                     | 18              |
| Czech Republic                             | Ostrava                                                               | Vítkovická Hospital a.s.                                         | 11              |
| Belarus                                    | Gomel                                                                 | Gomel Regional Clinical Hospital                                 | 8               |
| Latvia                                     | Riga                                                                  | Pauls Stradius Clinical University Hospital                      | 8               |
| Ukraine                                    | Kiev                                                                  | Bogomolets National Medical University                           | 8               |
| Japan                                      | Tokyo                                                                 | Keio University                                                  | 2               |

**Supplementary Table 1. Data quality (%)**

| <b>Variable</b>                            | <b>Overall<br/>(n=1432)</b> | <b>Pain Intensity<br/>group (n=727)</b> | <b>Pain Type group<br/>(n=1148)</b> | <b>Pain Localization<br/>group (n=1134)</b> | <b>Pain Duration<br/>(n=1202)</b> |
|--------------------------------------------|-----------------------------|-----------------------------------------|-------------------------------------|---------------------------------------------|-----------------------------------|
| Age at the time of admission               | 100                         | 100                                     | 100                                 | 100                                         | 100                               |
| Sex                                        | 100                         | 100                                     | 100                                 | 100                                         | 100                               |
| BMI (kg/m2)                                | 87.7                        | 96.8                                    | 90.4                                | 87.7                                        | 89.1                              |
| Etiology                                   | 100                         | 100                                     | 100                                 | 100                                         | 100                               |
| Length of hospital stay                    | 100                         | 100                                     | 100                                 | 100                                         | 100                               |
| Mortality                                  | 100                         | 100                                     | 100                                 | 100                                         | 100                               |
| Severity of pancreatitis                   | 100                         | 100                                     | 100                                 | 100                                         | 100                               |
| Local complications                        | 95.5                        | 95.5                                    | 99.5                                | 99.4                                        | 99.7                              |
| Fluid collection                           | 95.5                        | 95.5                                    | 99.5                                | 99.4                                        | 99.7                              |
| Pseudocyst                                 | 99.6                        | 99.6                                    | 99.6                                | 99.5                                        | 99.8                              |
| Necrosis                                   | 99.6                        | 99.6                                    | 99.6                                | 99.5                                        | 99.8                              |
| Systemic complication                      | 99.3                        | 100                                     | 99.4                                | 99.3                                        | 99.3                              |
| Respiratory failure                        | 99.2                        | 100                                     | 99.3                                | 99.2                                        | 99.2                              |
| Heart failure                              | 99.3                        | 100                                     | 99.4                                | 99.3                                        | 99.3                              |
| Renal failure                              | 99.3                        | 100                                     | 99.4                                | 99.3                                        | 99.3                              |
| AP in the personal history                 | 94.1                        | 99.8                                    | 95.9                                | 94.9                                        | 95.6                              |
| CP in the personal history                 | 94.1                        | 99.9                                    | 95.9                                | 94.9                                        | 95.6                              |
| DM in the personal history                 | 98.8                        | 100                                     | 99                                  | 98.9                                        | 99.3                              |
| Current smoking (Y/N)                      | 99.6                        | 99.2                                    | 99.7                                | 98.8                                        | 99.7                              |
| Cigarettes/day                             | 91.7                        | 98.2                                    | 92.1                                | 90.8                                        | 92.6                              |
| Pack year                                  | 65.1                        | 91.4                                    | 70.3                                | 65.1                                        | 69.1                              |
| Current alcohol (Y/N)                      | 99.7                        | 100                                     | 99.7                                | 99.7                                        | 99.8                              |
| Amount of alcohol consumption (g/occasion) | 73.4                        | 92.8                                    | 85.1                                | 75.2                                        | 77.1                              |
| Amount of alcohol consumption (g/day)      | 76.7                        | 90.7                                    | 81.8                                | 77.1                                        | 78.7                              |
| Pleural fluid                              | 82                          | 89.1                                    | 84.1                                | 82.6                                        | 84.8                              |
| Lung infiltrate                            | 81.6                        | 89.0                                    | 83.7                                | 82.2                                        | 84.3                              |
| Ascites                                    | 86.5                        | 92.0                                    | 88.1                                | 87                                          | 88.7                              |
| Abnormal pancreas structure                | 86.5                        | 92.0                                    | 88.1                                | 87                                          | 88.7                              |
| Hypoechoogenicity                          | 86.5                        | 92.0                                    | 88.1                                | 87                                          | 88.7                              |
| Hyperechoogenicity                         | 86.5                        | 92.0                                    | 88.1                                | 87                                          | 88.7                              |
| Edematous pancreas                         | 86.5                        | 92.0                                    | 88.1                                | 87                                          | 88.7                              |
| Irregular blurred contours                 | 86.5                        | 92.0                                    | 88.1                                | 87                                          | 88.7                              |
| Wirsung-dilatation                         | 86.5                        | 92.0                                    | 88.1                                | 87                                          | 88.7                              |
| Pancreatic calcification                   | 86.5                        | 92.0                                    | 88.1                                | 87                                          | 88.7                              |
| Fatty tissue infiltration                  | 86.5                        | 92.0                                    | 88.1                                | 87                                          | 88.7                              |
| Peripancreatic fluid collection            | 86.5                        | 92.0                                    | 88.1                                | 87                                          | 88.7                              |
| On-admission necrosis                      | 87.9                        | 92.4                                    | 89.6                                | 88.4                                        | 82.5                              |
| On-admission pseudocyst                    | 87.4                        | 92.2                                    | 89.1                                | 87.8                                        | 89.8                              |
| On-admission fluid collection              | 87.4                        | 92.2                                    | 89.1                                | 87.9                                        | 89.7                              |

## Supplementary Table 2. Representativeness

|                                                | Overall cohort<br>(n=1432) | Pain Intensity group<br>(n=727) | Pain Type group<br>(n=1148) | Pain Local. group<br>(n=1132) | Pain Duration group<br>(n=1202) | Pain Management Group<br>(n=885) |
|------------------------------------------------|----------------------------|---------------------------------|-----------------------------|-------------------------------|---------------------------------|----------------------------------|
| <b>Age, years, median (Q1-Q3)</b>              | 57 (43-69)                 | 56 (43-68)                      | 57 (43-69)                  | 57 (43-69)                    | 57 (42-69)                      | 57 (43-69)                       |
| <b>Gender</b>                                  |                            |                                 |                             |                               |                                 |                                  |
| Male, n (%)                                    | 817 (56.9)                 | 413 (56.8)                      | 641 (55.8)                  | 642 (56.7)                    | 690 (57.4)                      | 509 (57.5)                       |
| Female, n (%)                                  | 618 (43.1)                 | 314 (43.2)                      | 507 (44.2)                  | 490 (43.3)                    | 512 (42.6)                      | 376 (42.5)                       |
| <b>Etiology (pure)</b>                         |                            |                                 |                             |                               |                                 |                                  |
| Biliary, n (%)                                 | 535 (37.3)                 | 269 (37.0)                      | 444 (33.7)                  | 535 (37.3)                    | 457 (38.0)                      | 331 (37.4)                       |
| Alcoholic, n (%)                               | 258 (18.2)                 | 165 (22.7)                      | 216 (18.8)                  | 258 (18.2)                    | 226 (18.8)                      | 190 (21.5)                       |
| <b>Length of hospital stay, median (Q1-Q3)</b> | 9 (6-13)                   | 8 (5-11)                        | 8 (6-13)                    | 8 (6-12)                      | 8 (6-13)                        | 8 (5-11)                         |
| <b>Mortality, n (%)</b>                        | 36 (2.5)                   | 15 (2.1)                        | 20 (1.7)                    | 36 (2.5)                      | 29 (2.4)                        | 20 (2.3)                         |
| <b>Severity of pancreatitis</b>                |                            |                                 |                             |                               |                                 |                                  |
| Mild, n (%)                                    | 987 (68.9)                 | 540 (74.3)                      | 811 (70.6)                  | 987 (68.9)                    | 845 (70.3)                      | 656 (74.1)                       |
| Moderate, n (%)                                | 368 (25.7)                 | 159 (21.9)                      | 289 (25.2)                  | 368 (25.7)                    | 297 (24.7)                      | 189 (21.4)                       |
| Severe, n (%)                                  | 77 (5.38)                  | 28 (3.9)                        | 48 (4.2)                    | 77 (5.38)                     | 60 (5.0)                        | 40 (4.5)                         |
| <b>Local complications, n (%)</b>              | 435 (30.5)                 | 184 (25.5)                      | 331 (29.0)                  | 435 (30.5)                    | 350 (29.2)                      | 226 (25.7)                       |
| Fluid collection, n (%)                        | 373 (26.2)                 | 167 (23.1)                      | 293 (25.7)                  | 373 (26.2)                    | 302 (25.2)                      | 204 (23.2)                       |
| Pseudocyst, n (%)                              | 126 (8.8)                  | 48 (6.6)                        | 89 (7.8)                    | 126 (8.8)                     | 95 (7.9)                        | 63 (7.1)                         |
| Necrosis, n (%)                                | 132 (9.3)                  | 66 (9.1)                        | 101 (8.8)                   | 132 (9.3)                     | 106 (8.8)                       | 77 (8.7)                         |
| <b>Systemic complication, n (%)</b>            | 115 (8.1)                  | 58 (8.0)                        | 83 (7.3)                    | 115 (8.1)                     | 94 (7.9)                        | 68 (7.7)                         |
| Respiratory failure, n (%)                     | 68 (4.8)                   | 41 (5.7)                        | 50 (4.4)                    | 68 (4.8)                      | 60 (5.0)                        | 44 (5.0)                         |
| Heart failure, n (%)                           | 26 (1.8)                   | 15 (2.1)                        | 21 (1.8)                    | 26 (1.8)                      | 23 (1.9)                        | 18 (2.0)                         |
| Renal failure, n (%)                           | 43 (3.0)                   | 19 (2.6)                        | 33 (2.9)                    | 43 (3.0)                      | 36 (3.0)                        | 27 (3.0)                         |

### Supplementary Table 3. Definition of local and systemic complication adapted from the revised Atlanta classification

| Collection | Time after onset of pain (week) | Imaging features                                                                |
|------------|---------------------------------|---------------------------------------------------------------------------------|
| APFC       | ≤4                              | Homogeneous, fluid attenuation, conforms to retroperitoneal structures, no wall |
| ANC        | ≤4                              | Inhomogeneous, non-liquified components, no wall                                |
| Pseudocyst | >4                              | Homogeneous, fluid filled, circumscribed, encapsulated with wall                |

*Criterion for local pancreatic complications (Banks et al., 2012; Foster et al., 2016)*

*APFC: acute peripancreatic fluid collection, ANC: acute necrotic collection*

| Organ system                                       | Score 0 | Score 1                                | Score 2                                    | Score 3          | Score 4          |
|----------------------------------------------------|---------|----------------------------------------|--------------------------------------------|------------------|------------------|
| Respiratory (PaO <sub>2</sub> /FIO <sub>2</sub> )* | >400    | 301-400                                | 201-300                                    | 101-200          | ≤100             |
| Renal: serum creatinine (μmol/L)**                 | <134    | 134-169                                | 170-310                                    | 311-439          | >439             |
| Heart: systemic blood pressure***                  | >90     | <90, responsive to fluid resuscitation | <90, not responsive to fluid resuscitation | <90 with pH <7.3 | <90 with pH <7.2 |

*Criterion for systemic complications – Modified Marshall Scoring system (Banks et al., 2012; Foster et al., 2016)*

Note: a score 2 or higher indicates organ failure

\* If partial pressure of oxygen/fraction of inspired oxygen, or PaO<sub>2</sub>/FIO<sub>2</sub> was not available, patients with oxygen therapy was considered as having respiratory failure.

\*\* In the case of chronic kidney disease, further deterioration was considered as acute renal failure.

\*\*\* Besides, patients with vasopressor therapy was considered as having heart failure.

1. Banks, P. A., Bollen, T. L., Dervenis, C., Gooszen, H. G., Johnson, C. D., Sarr, M. G., . . . Acute Pancreatitis Classification Working, G. (2013). Classification of acute pancreatitis-2012: revision of the Atlanta classification and definitions by international consensus. *Gut*, 62(1), 102-111. doi:10.1136/gutjnl-2012-302779
2. Foster BR, Jensen KK, Bakis G, Shaaban AM, Coakley FV. Revised Atlanta Classification for Acute Pancreatitis: A Pictorial Essay. *Radiographics*. 2016 May-Jun;36(3):675-87. doi: 10.1148/rg.2016150097.

## Supplementary Table 4. On-admission imaging findings

|                                       | Pain Intensity   |                   |                                | Pain Type  |           |            |            | Pain Duration |                |                |                |                  | Pain localization |            |                |
|---------------------------------------|------------------|-------------------|--------------------------------|------------|-----------|------------|------------|---------------|----------------|----------------|----------------|------------------|-------------------|------------|----------------|
|                                       | VAS 1-6          | VAS 7-10          | OR<br>(95% CI)                 | cramping   | dull      | sharp      | P<br>value | <24 h         | 25-48 h        | 49-72 h        | >72 h          | p                | Typical           | Atypical   | OR<br>(95% CI) |
| Pleural fluid n (%)                   | 9 (4.8)          | 37 (8.0)          | NS                             | 31 (5.4)   | 11 (6.2)  | 14 (6.5)   | NS         | 41 (7.0)      | 11 (7.0)       | 4 (3.8)        | 10 (6.0)       | NS               | 29 (6.3)          | 26 (5.4)   | NS             |
| Abnormal pancreas structure n (%)     | <b>90 (47.1)</b> | <b>280 (58.6)</b> | <b>1.587<br/>(1.133-2.224)</b> | 306 (50.5) | 108(58.4) | 115 (52.3) | NS         | 328 (52.7)    | 90 (55.2)      | 55 (51.4)      | 78 (44.8)      | NS               | 252 (52.5)        | 258 (50.9) | NS             |
| Hypoechogenecity n (%)                | 20 (10.5)        | 58 (12.1)         | NS                             | 61 (10.1)  | 29(15.7)  | 29 (13.2)  | NS         | 74 (11.9)     | 20 (12.3)      | 9 (8.4)        | 20 (11.5)      | NS               | 62 (12.9)         | 56 (11.1)  | NS             |
| Hyperechogenecity n (%)               | 11 (5.8)         | 33 (4.0)          | NS                             | 24 (4.0)   | 16 (8.7)  | 7 (3.2)    | NS         | 29 (4.7)      | 11 (6.8)       | 7 (6.5)        | 5 (2.9)        | NS               | 26 (5.4)          | 21 (4.1)   | NS             |
| Edematous pancreas n (%)              | <b>6 (3.1)</b>   | <b>40 (8.4)</b>   | <b>2.816<br/>(1.174-6.756)</b> | 27 (4.5)   | 13 (7.0)  | 12 (5.5)   | NS         | 42 (6.8)      | <b>6 (3.7)</b> | <b>3 (2.8)</b> | <b>3 (1.7)</b> | <b>&lt;0.05*</b> | 20 (4.1)          | 24 (4.7)   | NS             |
| Enlarged pancreas n (%)               | 27(14.1)         | 83 (17.4)         | NS                             | 129 (19.4) | 28 (14.9) | 34 (15.7)  | NS         | 119 (19.4)    | 32 (20.1)      | 14 (13.3)      | 33 (18.8)      | NS               | 84 (17.2)         | 108 (21.7) | NS             |
| Wirsung-dilatation n (%)              | 20 (10.5)        | 47 (9.8)          | NS                             | 59 (9.7)   | 16 (8.7)  | 22 (10.0)  | NS         | 54 (8.7)      | 18 (11.0)      | 9 (8.4)        | 19 (10.9)      | NS               | 44 (9.2)          | 55 (10.9)  | NS             |
| Pancreatic calcification n (%)        | 3 (1.6)          | 15 (3.4)          | NS                             | 7 (1.2)    | 9 (4.9)   | 5 (2.3)    | NS         | 12 (1.9)      | 4 (2.5)        | 4 (3.7)        | 3 (1.7)        | NS               | 9 (1.9)           | 12 (2.4)   | NS             |
| Peripancreatic fluid collection n (%) | <b>21 (10.1)</b> | <b>93 (19.5)</b>  | <b>1.955<br/>(1.178-3.246)</b> | 103 (17.0) | 23 (12.4) | 43 (19.6)  | NS         | 110 (17.7)    | 28 (17.2)      | 14 (13.1)      | 22 (12.6)      | NS               | 89 (18.5)         | 64 (12.6)  | NS             |
| On-admission necrosis n (%)           | 7 (3.7)          | 9 (1.9)           | NS                             | 14 (2.3)   | 4 (2.1)   | 8 (3.6)    | NS         | 9 (1.4)       | 6 (3.6)        | 5 (4.6)        | 3 (1.7)        | NS               | 13 (2.6)          | 9 (1.8)    | NS             |

**Supplementary Table 5 – Pain intensity. Description and main outcomes**

|                                                          | VAS 1-6              | VAS 7-10            | p value / OR (95% CI)  |
|----------------------------------------------------------|----------------------|---------------------|------------------------|
| n (%)                                                    | 216 (29.7)           | 511 (70.3)          |                        |
| <b>EPIDEMIOLOGY</b>                                      |                      |                     |                        |
| Age, years, median (Q1-Q3) [n]                           | 57.5 (42-68) [216]   | 56 (43-67.3) [511]  | 0.205                  |
| Gender                                                   |                      |                     |                        |
| Male, n (%)                                              | 129 (59.7)           | 284 (55.6)          | 0.844 (0.602-1.166)    |
| Female, n (%)                                            | 87 (40.3)            | 227 (44.4)          |                        |
| BMI (kg/m <sup>2</sup> ), mean (SD)                      | 27.8 (6.1) [203]     | 27.8 (5.6) [500]    | 0.905                  |
| Obesity (BMI ≥30 kg/m <sup>2</sup> ), n (%)              | 81 (37.3%)           | 155 (30.4)          | 0.747<br>(0.535-1.044) |
| <b>ETIOLOGY</b>                                          |                      |                     |                        |
| Biliary, n (%)                                           | 79 (36.6)            | 197 (38.6)          | NS                     |
| Alcoholic, n (%)                                         | 56 (25.9)            | 129 (25.2)          |                        |
| Hypertriglyceridemic, n (%)                              | 10 (4.6)             | 31 (6.1)            |                        |
| Post-ERCP, n (%)                                         | 5 (2.3)              | 8 (1.6)             |                        |
| Idiopathic, n (%)                                        | 45 (20.8)            | 105 (20.6)          |                        |
| Other, n (%)                                             | 21 (9.7)             | 41 (8.0)            |                        |
| <b>ANAMNESTIC DATA</b>                                   |                      |                     |                        |
| AP in the personal history, n (%)                        | 61 (28.2)            | 141 (27.7)          | 0.899<br>(0.624-1.296) |
| CP in the personal history, n (%)                        | 7 (3.2)              | 27 (5.3)            | 1.622<br>(0.692-3.086) |
| HT in the personal history, n (%)                        | 114 (55.6)           | 255 (51.0)          | 0.832<br>(0.600-1.155) |
| HL in the personal history, n (%)                        | 24 (11.1)            | 65 (12.8)           | 1.253<br>(0.757-2.074) |
| DM in the personal history, n (%)                        | 37 (17.1)            | 80 (15.7)           | 0.898<br>(0.586-1.386) |
| <b>CCI</b>                                               |                      |                     |                        |
| 0, n (%)                                                 | 67 (37.9)            | 131 (36.6)          | NS                     |
| 1, n (%)                                                 | 37 (20.1)            | 97 (27.1)           |                        |
| 2, n (%)                                                 | 23 (13.0)            | 54 (15.1)           |                        |
| ≥3, n (%)                                                | 50 (28.3)            | 76 (21.2)           |                        |
| <b>Symptoms (Y/N), n (%)</b>                             |                      |                     |                        |
| abdominal tenderness, n (%)                              | 184 (84.8)           | 468 (91.8)          | 2.014<br>(1.237-3.277) |
| abdominal guarding, n (%)                                | 31 (14.3)            | 92 (18.0)           | 1.379<br>(0.882-2.155) |
| Current smoking (Y/N), n (%)                             | 69 (31.9)            | 151 (29.6)          | 0.894<br>(0.634-1.260) |
| Cigarettes/day median (Q1-Q3) [n]                        | 20 (10-20) [67]      | 15 (10-20) [149]    | 0.201                  |
| Pack year median (Q1-Q3) [n]                             | 20 (10-30) [79]      | 15.5 (8.7-30) [212] | 0.266                  |
| Current alcohol (Y/N), n (%)                             | 88 (40.7)            | 246 (48.1)          | 1.350<br>(0.978-1.863) |
| Amount of alcohol consumption (g/day) median (Q1-Q3) [n] | 75 (26.8-112.5) [39] | 50 (10.7-100) [106] | 0.168                  |

|                                                  | VAS 1-6              | VAS 7-10             | OR (reference: VAS 1-6) | 95% CI             |
|--------------------------------------------------|----------------------|----------------------|-------------------------|--------------------|
| <b>MAIN OUTCOMES</b>                             |                      |                      |                         |                    |
| Length of hospital stay median (Q1-Q3) [n]       | 8 (6-13) [216]       | 7.5 (5-10) [511]     | <b>p&lt;0.001</b>       |                    |
| <b>Mortality, n (%)</b>                          | 4 (1.9)              | 11 (2.2)             | 1.562                   | 0.431-5.655        |
| Mild+moderate vs severe pancreatitis             |                      |                      |                         |                    |
| Severity of pancreatitis                         |                      |                      |                         |                    |
| Mild, n (%)                                      | 161 (74.5)           | 379 (74.2)           | 1.989                   | 0.746-5.302        |
| Moderate, n (%)                                  | 50 (23.2)            | 109 (21.3)           |                         |                    |
| <b>Severe, n (%)</b>                             | 5 (2.3)              | 23 (4.5)             |                         |                    |
| All local complication                           | 56 (25.9)            | 128 (25.3)           | 0.956                   | 0.682-1.342        |
| Fluid collection n (%)                           | 45 (20.8)            | 122 (24.1)           | 1.343                   | 0.927-1.944        |
| Necrosis n (%)                                   | 18 (8.3)             | 48 (9.5)             | 0.814                   | 0.450-1.472        |
| <b>Pseudocyst n (%)</b>                          | 16 (7.4)             | 32 (6.3)             | 1.07                    | 0.620-1.845        |
| All systemic complications                       | 18 (8.3)             | 40 (9.5)             | 1.392                   | 0.648-2.994        |
| New onset diabetes n (%)                         | 7 (3.2)              | 23 (4.5)             | 0.909                   | 0.508-1.628        |
| Renal failure n (%)                              | 8 (3.7)              | 11 (2.2)             | 0.572                   | 0.227-1.442        |
| Respiratory failure n (%)                        | 10 (4.6)             | 31 (6.1)             | 1.33                    | 0.640-2.764        |
| <b>Heart failure n (%)</b>                       | 2 (0.9)              | 13 (6.1)             | 2.793                   | 0.625-12.484       |
| <b>ANALGESIC REQUIREMENT</b>                     |                      |                      |                         |                    |
| Opioid use, n (%)                                | <b>22 (10.5)</b>     | <b>111 (22.2)</b>    | <b>2.561</b>            | <b>1.573-4.169</b> |
| Number of days with analgesic median (Q1-Q3) [n] | <b>2 (1-5) [169]</b> | <b>3 (2-5) [429]</b> | <b>p=0.009</b>          |                    |
| Number of days with opioid, median (Q1-Q3) [n]   | 2 (1-3.75) [22]      | 2 (1-3.5) [115]      | p=0.844                 |                    |

## Supplementary Table 6. Pain type. Description and main outcomes

| n (%)                                                    | Pain type          |                   |                   | p value* |
|----------------------------------------------------------|--------------------|-------------------|-------------------|----------|
|                                                          | cramping           | dull              | sharp             |          |
|                                                          | 705 (61.4)         | 207 (18.0)        | 236 (20.6)        |          |
| <b>EPIDEMIOLOGY</b>                                      |                    |                   |                   |          |
| Age, years, median (Q1-Q3) [n]                           | 58 (43.5-69)       | 55 (42-68.3)      | 54 (42-67)        | 0.144    |
| Gender                                                   |                    |                   |                   |          |
| Male, n (%)                                              | 378 (53.6)         | 125 (60.4)        | 138 (58.5)        | NS       |
| Female, n (%)                                            | 327 (45.4)         | 82 (39.6)         | 98 (41.5)         |          |
| BMI (kg/m <sup>2</sup> ), mean (SD)                      | 28.0±5.8 [625]     | 27.7±5.9 [197]    | 27.9±5.3 [216]    | 0.807    |
| Obesity (BMI ≥30 kg/m <sup>2</sup> ), n (%)              | 281 (39.9)         | 68 (32.9)         | 75 (31.8)         | NS       |
| <b>ETIOLOGY</b>                                          |                    |                   |                   |          |
| Biliary, n (%)                                           | <b>310 (44.0)</b>  | <b>69 (33.3)</b>  | <b>88 (27.3)</b>  | <0.05*   |
| Alcoholic, n (%)                                         | <b>130 (18.4)</b>  | <b>59 (28.5)</b>  | <b>61 (25.9)</b>  |          |
| Hypertriglyceridemic, n (%)                              | 39 (5.5)           | 10 (4.8)          | 16 (6.8)          |          |
| Post-ERCP, n (%)                                         | 15 (2.1)           | 5 (2.4)           | 5 (2.1)           |          |
| Idiopathic, n (%)                                        | 147 (20.9)         | 52 (25.1)         | 43 (18.2)         |          |
| Other, n (%)                                             | 64 (9.1)           | 12 (5.8)          | 23 (9.8)          |          |
| <b>ANAMNESTIC DATA</b>                                   |                    |                   |                   |          |
| AP in the personal history, n (%)                        | 158 (23.8)         | 66 (32.2)         | 56 (24.1)         | NS       |
| CP in the personal history, n (%)                        | 28 (4.2)           | 15 (7.3)          | 6 (2.6)           | NS       |
| HT in the personal history, n (%)                        | 359 (57.4)         | 102 (51.8)        | 99 (54.8)         | NS       |
| HL in the personal history, n (%)                        | 90 (17.1)          | 26 (13.4)         | 32 (14.6)         | NS       |
| DM in the personal history, n (%)                        | 117 (16.9)         | 35 (16.9)         | 32 (13.4)         | NS       |
| CCI                                                      |                    |                   |                   |          |
| 0, n (%)                                                 | 252 (38.2)         | 45 (32.4)         | 56 (35.2)         | NS       |
| 1, n (%)                                                 | 180 (27.3)         | 25 (18.0)         | 46 (28.9)         |          |
| 2, n (%)                                                 | 100 (15.4)         | 25 (18.0)         | 22 (13.8)         |          |
| ≥3, n (%)                                                | 128 (19.4)         | 44 (31.7)         | 35 (22.0)         |          |
| Symptoms (Y/N), n (%)                                    |                    |                   |                   |          |
| abdominal tenderness, n (%)                              | 589 (87.5)         | 179 (86.9)        | 203 (87.1)        | NS       |
| abdominal guarding, n (%)                                | <b>56 (8.4)</b>    | <b>34 (16.5)</b>  | <b>61 (26.2)</b>  | <0.05    |
| Current smoking (Y/N), n (%)                             | 188 (26.8)         | 66 (31.9)         | 69 (29.4)         | NS       |
| Cigarettes/day median (Q1-Q3) [n]                        | 17.5 (10-20) [170] | 15.0 (10-20) [63] | 20 (10-20) [68]   | 0.163    |
| Pack year median (Q1-Q3) [n]                             | 18 (10-30) [184]   | 15 (8-30) [65]    | 18.5 (10-35) [84] | 0.602    |
| Amount of alcohol consumption (g/day) median (Q1-Q3) [n] | 75 (25-16) [131]   | 50 (22-81) [39]   | 50 (25-125) [47]  | 0.859    |

| <b>MAIN OUTCOMES</b>                                                 | cramping             | dull                 | sharp                | OR (reference: VAS 1-6) | 95% CI             |
|----------------------------------------------------------------------|----------------------|----------------------|----------------------|-------------------------|--------------------|
| Length of hospital stay median (Q1-Q3) [n]                           | 9 (6-13) [705]       | 8 (6-11) [205]       | 8 (5-12) [236]       | <b>p&lt;0.05</b>        |                    |
| <b>Mortality, n (%)</b>                                              | 9 (1.3)              | 3 (1.4)              | 8 (3.4)              | 2.632                   | 1.063-6.514        |
| <b>Severity of pancreatitis</b> Mild+moderate vs severe pancreatitis |                      |                      |                      |                         |                    |
| Mild, n (%)                                                          | 496 (70.4)           | 158 (76.3)           | 157 (66.5)           | <b>2.206</b>            | <b>1.199-4.059</b> |
| Moderate, n (%)                                                      | 185 (26.2)           | 42 (20.3)            | 62 (26.3)            |                         |                    |
| Severe, n (%)                                                        | <b>24 (3.4)</b>      | <b>7 (3.4)</b>       | <b>17 (7.2)</b>      |                         |                    |
| All local complication                                               | 203 (28.9)           | 51 (24.9)            | 77 (32.8)            | 0.779                   | 0.571-1.062        |
| Fluid collection n (%)                                               | 177 (25.2)           | 48 (23.4)            | 68 (28.9)            | 1.197                   | 0.881-1.627        |
| Necrosis n (%)                                                       | <b>57 (8.1)</b>      | <b>14 (6.8)</b>      | <b>30 (12.7)</b>     | <b>1.653</b>            | <b>1.060-2.580</b> |
| Pseudocyst n (%)                                                     | 57 (8.8)             | 14 (6.3)             | 30 (5.9)             | 0.571                   | 0.313-1.043        |
| All systemic complications                                           | 35 (5.0)             | 17 (8.2)             | 31 (13.1)            | 2.481                   | 1.550-3.969        |
| New onset diabetes n (%)                                             | <b>18 (2.6)</b>      | <b>10 (4.9)</b>      | <b>19 (8.1)</b>      | <b>2.561</b>            | <b>1.472-4.456</b> |
| Renal failure n (%)                                                  | 17 (2.4)             | 8 (3.9)              | 8 (3.4)              | 1.235                   | 0.550-2.775        |
| Respiratory failure n (%)                                            | <b>19 (2.7)</b>      | <b>9 (4.3)</b>       | <b>22 (9.3)</b>      | <b>3.22</b>             | <b>1.806-5.740</b> |
| Heart failure n (%)                                                  | <b>10 (1.0)</b>      | <b>2 (1.4)</b>       | <b>9 (3.8)</b>       | <b>3.222</b>            | <b>1.319-7.869</b> |
| <b>ANALGESIC REQUIREMENT</b>                                         |                      |                      |                      |                         |                    |
| Opioid use, n (%)                                                    | <b>65 (15.4)</b>     | <b>29 (15.9)</b>     | <b>48 (24.9)</b>     | <b>2.25</b>             | <b>1.585-3.194</b> |
| Number of days with analgesic median (Q1-Q3) [n]                     | <b>4 (2-6) [598]</b> | <b>2 (2-6) [170]</b> | <b>4 (2-7) [208]</b> | <b>p=0.005</b>          |                    |
| Number of days with opioid, median (Q1-Q3) [n]                       | 2 (1-4) [89]         | 2 (1-4) [31]         | 2 (1-5) [60]         | p=0.938                 |                    |

## Supplementary Table 7. Pain localization (atypical/typical). Description and main outcomes

| n (%)                                                    | Pain type             |                          |                                |
|----------------------------------------------------------|-----------------------|--------------------------|--------------------------------|
|                                                          | Typical               | Atypical                 | p value / OR (95% CI)          |
| <b>EPIDEMIOLOGY</b>                                      |                       |                          |                                |
| Age, years, median (Q1-Q3) [n]                           | 56 (42-69)<br>[557]   | 57 (44-70)<br>[577]      | 0.192                          |
| Gender                                                   |                       |                          |                                |
| Male, n (%)                                              | 321 (57.6)            | 322 (55.8)               | 1.077 (0.852-1.363)            |
| Female, n (%)                                            | 236 (42.4)            | 255 (44.2)               |                                |
| BMI (kg/m <sup>2</sup> ), mean (SD)                      | 27.5±5.5<br>[506]     | 28.1±6.0<br>[504]        | 0.137                          |
| Obesity (BMI ≥30 kg/m <sup>2</sup> ), n (%)              | <b>188 (44.8)</b>     | <b>232 (55.2)</b>        | <b>1.320<br/>(1.036-1.681)</b> |
| <b>ETIOLOGY</b>                                          |                       |                          |                                |
| Biliary, n (%)                                           | 224 (40.2)            | 236 (40.9)               | NS                             |
| Alcoholic, n (%)                                         | 137 (24.6)            | 106 (18.4)               |                                |
| Hypertriglyceridemic, n (%)                              | 28 (5.0)              | 35 (6.1)                 |                                |
| Post-ERCP, n (%)                                         | 11 (2.0)              | 15 (2.6)                 |                                |
| Idiopathic, n (%)                                        | 111 (19.9)            | 130 (22.5)               |                                |
| Other, n (%)                                             | 46 (8.3)              | 55 (9.5)                 |                                |
| <b>ANAMNESTIC DATA</b>                                   |                       |                          |                                |
| AP in the personal history, n (%)                        | 137 (25.8)            | 126 (23.1)               | 0.840<br>(0.628-1.124)         |
| CP in the personal history, n (%)                        | 23 (4.3)              | 28 (5.1)                 | 1.204<br>(0.677-2.141)         |
| HT in the personal history, n (%)                        | <b>258 (51.0)</b>     | <b>290 (57.5)</b>        | <b>1.303<br/>(1.016-1.669)</b> |
| HL in the personal history, n (%)                        | <b>53 (12.0)</b>      | <b>86 (20.4)</b>         | <b>1.889<br/>(1.302-2.741)</b> |
| DM in the personal history, n (%)                        | 96 (17.4)             | 96 (16.8)                | 0.962<br>(0.705-1.313)         |
| <b>CCI</b>                                               |                       |                          |                                |
| 0, n (%)                                                 | 168 (30.8)            | 180 (34.8)               | NS                             |
| 1, n (%)                                                 | 127 (27.8)            | 149 (28.8)               |                                |
| 2, n (%)                                                 | 70 (15.3)             | 80 (15.5)                |                                |
| ≥3, n (%)                                                | 92 (20.1)             | 108 (20.9)               |                                |
| <b>Symptoms (Y/N), n (%)</b>                             |                       |                          |                                |
| abdominal tenderness, n (%)                              | 455 (85.7)            | 472 (85.4)               | 0.973<br>(0.694-1.365)         |
| abdominal guarding, n (%)                                | 66 (12.5)             | 64 (11.6)                | 0.920<br>(0.638-1.327)         |
| Current smoking (Y/N), n (%)                             | 162 (29.2)            | 161 (28.0)               | 0.943<br>(0.729-1.221)         |
| Cigarettes/day median (Q1-Q3) [n]                        | 15 (10-20)<br>[148]   | 15 (10-20) [149]         | 0.719                          |
| Pack year median (Q1-Q3) [n]                             | 16.5 (10-30)<br>[144] | 18.8 (8.6-34.1)<br>[159] | 0.662                          |
| Current alcohol (Y/N), n (%)                             | 252 (45.1)            | 241 (41.8)               | 0.865<br>(0.684-1.094)         |
| Amount of alcohol consumption (g/day) median (Q1-Q3) [n] | 75 (25-125)<br>[112]  | 62.5 (25-100)<br>[92]    | NS                             |

|                                                                      | Typical        | Atypical       | OR (reference: typical) | 95% CI      |
|----------------------------------------------------------------------|----------------|----------------|-------------------------|-------------|
| <b>MAIN OUTCOMES</b>                                                 |                |                |                         |             |
| Length of hospital stay median (Q1-Q3) [n]                           | 9 (6-13) [557] | 8 (6-12) [577] | NS                      |             |
| <b>Mortality, n (%)</b>                                              | 9 (1.6)        | 14 (2.4)       | 1.706                   | 0.527-1.622 |
| <b>Severity of pancreatitis</b> Mild+moderate vs severe pancreatitis |                |                |                         |             |
| Mild, n (%)                                                          | 388 (69.7)     | 418 (72.4)     | 0.924                   | 0.527-5.302 |
| Moderate, n (%)                                                      | 143 (25.7)     | 134 (23.2)     |                         |             |
| Severe, n (%)                                                        | 26 (4.7)       | 25 (4.3)       |                         |             |
| All local complication                                               | 171 (30.8)     | 149 (26.1)     | 0.8                     | 0.625-1.025 |
| Fluid collection n (%)                                               | 151 (27.2)     | 130 (22.8)     | 0.83                    | 0.641-1.076 |
| Necrosis n (%)                                                       | 55 (9.9)       | 42 (7.3)       | 0.716                   | 0.475-1.079 |
| Pseudocyst n (%)                                                     | 39 (7.0)       | 45 (7.9)       | 1.019                   | 0.659-1.574 |
| All systemic complications                                           | 40 (7.2)       | 46 (8.0)       | 1.096                   | 0.701-1.715 |
| New onset diabetes n (%)                                             | 41 (7.2)       | 18 (3.2)       | 0.408                   | 0.231-0.720 |
| Renal failure n (%)                                                  | 13 (2.4)       | 19 (3.3)       | 1.425                   | 0.697-2.913 |
| Respiratory failure n (%)                                            | 26 (4.7)       | 27 (4.7)       | 0.963                   | 0.552-1.691 |
| Heart failure n (%)                                                  | 9 (1.6)        | 10 (1.8)       | 0.36                    | 0.360-2.449 |
| <b>ANALGESIC REQUIREMENT</b>                                         |                |                |                         |             |
| Opioid use, n (%)                                                    | 88 (15.8)      | 92 (15.9)      | 1.011                   | 0.735-1.390 |
| Number of days with analgesic median (Q1-Q3) [n]                     | 4 (2-7) [464]  | 4 (2-6) [488]  | p=0.701                 |             |
| Number of days with opioid, median (Q1-Q3) [n]                       | 2 (1-5) [88]   | 2 (1-5) [92]   | p=0.705                 |             |



**Supplementary Table 8. Pain localization (horizontal and vertical). Description and main outcomes**

|                                                               | Horizontal deviation |                     |                        |                         | Vertical deviation    |                       |                          |                       |
|---------------------------------------------------------------|----------------------|---------------------|------------------------|-------------------------|-----------------------|-----------------------|--------------------------|-----------------------|
|                                                               | Upper                | Middle Hor          | Lower                  | Other Hor               | Right                 | Middle Ver            | Left                     | Other Ver             |
| n (%)                                                         | 525 (46.3)           | 259 (22.8)          | 34 (3.0)               | 316 (27.9)              | 99 (8.7)              | 407 (35.9)            | 41 (3.6)                 | 587 (51.8)            |
| <b>EPIDEMIOLOGICAL DATA</b>                                   |                      |                     |                        |                         |                       |                       |                          |                       |
| Age, years, median (Q1-Q3) [n]                                | 54 (42-67)<br>[525]  | 58 (43-72)<br>[259] | 56 (45.3-66.8)<br>[34] | 60 (45-71)<br>[316]     | 60 (45-72)<br>[99]    | 56 (43-70)<br>[407]   | 55 (41-68)<br>[41]       | 57 (43.5-68)<br>[587] |
| <b>Gender</b>                                                 |                      |                     |                        |                         |                       |                       |                          |                       |
| Male, n (%)                                                   | 293 (55.8)           | 162 (62.3)          | 20 (58.8)              | 168 (53.2)              | 50 (50.5)             | 244 (60.0)            | 27 (65.9)                | 322 (54.9)            |
| Female, n (%)                                                 | 232 (44.2)           | 97 (37.5)           | 14 (41.2)              | 148 (46.8)              | 49 (49.5)             | 163 (40.1)            | 14 (34.2)                | 265 (45.1)            |
| BMI (kg/m <sup>2</sup> )                                      | 28.2±5.8<br>[480]    | 27.8±5.7<br>[210]   | 27.6±5.7<br>[29]       | 25.6±5.8<br>[291]       | 27.7±5.6<br>[76]      | 27.6±5.8<br>[358]     | 29.0±7.0<br>[36]         | 27.5±4.9<br>[540]     |
| Obesity (BMI ≥30 kg/m <sup>2</sup> ), n (%)                   | 177 (33.7)           | 108 (41.7)          | 10 (29.4)              | 125 (40.0)              | 47 (47.5)             | 152 (37.6)            | 14 (34.2)                | 207 (35.3)            |
| <b>ETIOLOGY</b>                                               |                      |                     |                        |                         |                       |                       |                          |                       |
| Biliary, n (%)                                                | 223 (42.5)           | 97 (37.5)           | 9 (26.5)               | 131 (41.5)              | 59 (59.6)             | 150 (36.9)            | 9 (22.0)                 | 242 (41.2)            |
| Alcoholic, n (%)                                              | 129 (24.6)           | 55 (21.2)           | 6 (17.7)               | 53 (16.8)               | 9 (9.1)               | 99 (24.3)             | 10 (24.4)                | 125 (21.3)            |
| Hypertriglyceridemic, n (%)                                   | 26 (5.0)             | 14 (5.4)            | 2 (5.9)                | 21 (6.7)                | 6 (6.1)               | 29 (7.1)              | 2 (4.9)                  | 26 (4.4)              |
| Post-ERCP, n (%)                                              | 10 (2.0)             | 4 (1.5)             | 0 (0.0)                | 12 (3.8)                | 5 (5.1)               | 7 (1.7)               | 1 (2.4)                  | 13 (2.2)              |
| Idiopathic, n (%)                                             | 96 (18.3)            | 62 (23.9)           | 12 (35.3)              | 71 (22.5)               | 13 (13.1)             | 94 (23.1)             | 12 (29.3)                | 122 (20.8)            |
| Other, n (%)                                                  | 41 (7.8)             | 27 (10.4)           | 5 (10.4)               | 28 (8.9)                | 7 (7.1)               | 28 (6.9)              | 7 (17.1)                 | 59 (10.1)             |
| <b>ANAMNESTIC DATA</b>                                        |                      |                     |                        |                         |                       |                       |                          |                       |
| AP in the personal history, n (%)                             | 113 (22.7)           | 71 (28.7)           | 4 (12.1)               | 75 (25.1)               | 9 (9.9)               | 99 (26.0)             | 6 (16.7)                 | 149 (26.2)            |
| CP in the personal history, n (%)                             | 21 (4.2)             | 13 (5.3)            | 1 (3.0)                | 16 (5.4)                | 1 (1.1)               | 21 (5.5)              | 1 (2.8)                  | 28 (4.9)              |
| DM in the personal history, n (%)                             | 88 (16.9)            | 40 (15.6)           | 4 (11.8)               | 60 (19.4)               | 21 (21.7)             | 81 (20.0)             | 1 (2.4)                  | 89 (15.4)             |
| Current smoking (Y/N), n (%)                                  | 145 (27.7)           | 79 (30.5)           | 11 (32.4)              | 88 (28.0)               | 25 (25.5)             | 110 (27.1)            | 13 (31.7)                | 175 (29.9)            |
| Cigarettes/day median (Q1-Q3) [n]                             | 15 (10-20)<br>[133]  | 20 (10-20)<br>[74]  | 20 (20-30)<br>[9]      | 15 (10-20)<br>[81]      | 15 (5-10)<br>[25]     | 15 (10-20)<br>[105]   | 15 (10-27.5)<br>[11]     | 20 (10-20)<br>[156]   |
| Pack year median (Q1-Q3) [n]                                  | 15 (7.8-30)<br>[143] | 20 (12-61)<br>[59]  | 25 (15-33.3)<br>[13]   | 18.4 (8.5-36.4)<br>[88] | 12 (7.5-30)<br>[17]   | 18 (10-30.8)<br>[109] | 13.5 (6.4-18.9)<br>[11]  | 18.8 (10-30)<br>[11]  |
| Current alcohol (Y/N), n (%)                                  | 232 (44.2)           | 113 (44.0)          | 11 (52.9)              | 130 (41.3)              | 33 (33.7)             | 185 (45.5)            | 15 (36.6)                | 260 (44.4)            |
| Amount of alcohol consumption (g/occasion) median (Q1-Q3) [n] | 50 (25-100)<br>[182] | 50 (25-100)<br>[79] | 62.5 (25-100)<br>[16]  | 50 (25-100)<br>[96]     | 50 (25-100)<br>[25]   | 75 (25-100)<br>[149]  | 62.3 (31.3-93.8)<br>[10] | 50 (25-100)<br>[195]  |
| Amount of alcohol consumption (g/day) median (Q1-Q3) [n]      | 75 (25-125)<br>[96]  | 75 (25-100)<br>[53] | 75 (20.5-175)<br>[10]  | 75 (25-100)<br>[46]     | 50 (32.1-100)<br>[13] | 75 (50-112.5)<br>[79] | 50 (20.5-81.3)<br>[79]   | 75 (25-125)<br>[105]  |
| Length of hospital stay median (Q1-Q3) [n]                    | 8 (6-13)             | 9 (6-13.5)          | 7.5 (6-10)             | 8 (6-11)                | 9 (6.5-12.5)          | 8 (6-13)              | 9 (6-14)                 | 8 (6-12)              |
| <b>MAIN OUTCOMES</b>                                          |                      |                     |                        |                         |                       |                       |                          |                       |
| Mortality, n (%)                                              | 10 (1.9)             | 3 (1.2)             | 2 (5.9)                | 8 (2.5)                 | 1 (1.0)               | 8 (2.0)               | 1 (2.4)                  | 13 (2.4)              |
| <b>Severity of pancreatitis</b>                               |                      |                     |                        |                         |                       |                       |                          |                       |
| Mild, n (%)                                                   | 375 (71.4)           | 175 (67.6)          | 25 (75.5)              | 231 (73.1)              | 77 (77.8)             | 281 (69.0)            | 21 (51.2)                | 427 (72.7)            |
| Moderate, n (%)                                               | 125 (23.8)           | 76 (29.3)           | 6 (17.7)               | 70 (22.2)               | 19 (19.2)             | 106 (26.0)            | 16 (39.0)                | 136 (23.1)            |
| Severe, n (%)                                                 | 25 (4.8)             | 8 (3.1)             | 3 (8.8)                | 15 (4.8)                | 3 (3.0)               | 20 (4.9)              | 4 (9.8)                  | 24 (4.1)              |
| All local complication                                        | 148 (17.6)           | 84 (20.8)           | 10 (13.3)              | 78 (12.6)               | 19 (19.4)             | 126 (31.3)            | 20 (48.8)                | 155 (26.7)            |
| Fluid collection n (%)                                        | 130 (24.8)           | 73 (28.5)           | 9 (26.5)               | 69 (22.0)               | 15 (15.3)             | 108 (26.8)            | 19 (46.3)                | 139 (23.8)            |
| Necrosis n (%)                                                | 50 (9.5)             | 19 (7.4)            | 3 (8.8)                | 25 (8.0)                | 6 (6.1)               | 41 (10.2)             | 2 (4.9)                  | 48 (8.2)              |
| Pseudocyst n (%)                                              | 31 (5.9)             | 22 (8.6)            | 4 (11.8)               | 27 (8.6)                | 8 (8.2)               | 29 (7.2)              | 6 (14.6)                 | 41 (7.0)              |
| All systemic complications                                    | 39 (7.5)             | 16 (6.3)            | 4 (11.8)               | 27 (8.6)                | 8 (8.3)               | 31 (7.6)              | 7 (17.1)                 | 40 (6.9)              |
| New onset diabetes n (%)                                      | 28 (5.3)             | 11 (4.3)            | 1 (2.9)                | 12 (3.8)                | 4 (4.1)               | 21 (5.2)              | 0 (0.0)                  | 27 (4.6)              |
| Renal failure n (%)                                           | 14 (2.7)             | 6 (2.3)             | 3 (8.8)                | 9 (2.9)                 | 4 (4.1)               | 12 (3.0)              | 2 (4.9)                  | 14 (2.4)              |
| Respiratory failure n (%)                                     | 24 (4.6)             | 8 (3.1)             | 2 (5.9)                | 19 (6.1)                | 2 (2.1)               | 21 (5.2)              | 4 (9.8)                  | 26 (4.5)              |
| Heart failure n (%)                                           | 9 (1.7)              | 2 (0.8)             | 2 (5.9)                | 6 (1.9)                 | 1 (1.0)               | 11 (2.7)              | 0 (0.0)                  | 7 (1.2)               |
| <b>ANALGESIC REQUIREMENT</b>                                  |                      |                     |                        |                         |                       |                       |                          |                       |
| Opioid use, n (%)                                             | 104 (19.8)           | 29 (11.2)           | 4 (11.8)               | 43 (13.6)               | 10 (10.1)             | 62 (15.2)             | 9 (22.0)                 | 99 (16.9)             |
| Number of days with analgesic median (Q1-Q3) [n]              | 4 (2-7) [445]        | 4 (1-7) [210]       | 4 (1-4.3) [21]         | 3 (2-5) [267]           | 5 (2-7) [79]          | 4 (2-7) [356]         | 4 (2-7.5) [35]           | 4 (1-6) [482]         |
| Number of days with opioid, median (Q1-Q3) [n]                | 2 (1-4) [104]        | 2 (1-5) [29]        | 1 (1-1.5) [4]          | 2 (1-7) [44]            | 5 (1.3-10.8) [10]     | 2 (1-5) [62]          | 2 (1-4) [9]              | 2 (1-4) [99]          |
| <b>ABDOMINAL IMAGING</b>                                      |                      |                     |                        |                         |                       |                       |                          |                       |
| Pleural fluid n (%)                                           | 21 (4.8)             | 15 (7.2)            | 4 (14.3)               | 15 (5.8)                | 1 (1.4)               | 24 (6.8)              | 1 (3.2)                  | 29 (6.0)              |
| Abnormal pancreas structure n (%)                             | 238 (52.2)           | 123 (55.4)          | 15 (50.0)              | 134 (48.0)              | 31 (38.8)             | 210 (58.2)            | 14 (42.4)                | 255 (49.7)            |
| Hypoechoogenicity n (%)                                       | 59 (12.9)            | 28 (12.7)           | 2 (6.7)                | 29 (10.4)               | 9 (11.3)              | 49 (13.6)             | 4 (12.1)                 | 56 (10.9)             |
| Hyperechoogenicity n (%)                                      | 25 (5.5)             | 8 (3.6)             | 2 (6.7)                | 12 (4.3)                | 0 (0.0)               | 20 (5.5)              | 0 (0.0)                  | 27 (5.3)              |
| Edematous pancreas n (%)                                      | 29 (6.7)             | 10 (4.5)            | 1 (3.3)                | 4 (1.4)                 | 1 (1.3)               | 13 (3.6)              | 5 (15.2)                 | 25 (4.9)              |
| Enlarged pancreas n (%)                                       | 77 (16.9)            | 48 (21.7)           | 4 (13.3)               | 54 (19.4)               | 9 (11.3)              | 64 (17.7)             | 8 (24.2)                 | 102 (19.9)            |
| Wirsung-dilatation n (%)                                      | 45 (9.9)             | 27 (12.2)           | 2 (6.7)                | 25 (8.9)                | 8 (10.0)              | 45 (12.5)             | 2 (6.1)                  | 44 (8.6)              |
| Pancreatic calcification n (%)                                | 76 (1.5)             | 40 (2.7)            | 4 (3.3)                | 33 (2.5)                | 1 (1.3)               | 7 (1.9)               | 1 (3.0)                  | 12 (2.3)              |
| Peripancreatic fluid collection n (%)                         | 76 (16.7)            | 40 (18.0)           | 4 (13.3)               | 33 (11.8)               | 4 (5.0)               | 67 (18.6)             | 8 (24.2)                 | 74 (14.4)             |
| On-admission necrosis n (%)                                   | 9 (1.9)              | 8 (3.6)             | 1 (3.3)                | 4 (1.4)                 | 1 (1.3)               | 9 (2.4)               | 0 (0.0)                  | 12 (2.3)              |

**Supplementary Table 9. Pain duration prior to hospitalization. Description and main outcomes**

|                                                          | Pain duration    |                   |                 |                 | P value*      |
|----------------------------------------------------------|------------------|-------------------|-----------------|-----------------|---------------|
|                                                          | <24 h            | 25-48 h           | 49-72 h         | >72 h           |               |
| n (%)                                                    | 682 (57.7)       | 170 (14.4)        | 119 (10.1)      | 211 (17.8)      |               |
| <b>EPIDEMIOLOGY</b>                                      |                  |                   |                 |                 |               |
| Age, years, median (Q1-Q3) [n]                           | 57 (43-70)       | 53 (40.5-67)      | 57.5 (43-71)    | 57 (42-67)      | 0.099         |
| Gender                                                   |                  |                   |                 |                 |               |
| Male, n (%)                                              | 398 (58.4)       | 101 (59.4)        | 71 (59.7)       | 113 (53.4)      | NS            |
| Female, n (%)                                            | 284 (41.6)       | 69 (40.6)         | 48 (40.3)       | 98 (40.6)       |               |
| BMI (kg/m2), mean (SD)                                   | <b>27.9±5.3</b>  | <b>27.5±6.1</b>   | <b>27.6±5.1</b> | <b>27.1±6.4</b> | <b>0.012*</b> |
| Obesity (BMI 30 ≥kg/m2), n (%)                           | 245 (35.9) [682] | 72 (34.1) [187]   | 60 (32.1) [122] | 44 (36.1) [211] | NS            |
| <b>ETIOLOGY</b>                                          |                  |                   |                 |                 |               |
| Biliary, n (%)                                           | 275 (40.3)       | 71 (38.0)         | 48 (39.3)       | 85 (40.3)       | NS            |
| Alcoholic, n (%)                                         | 141 (20.7)       | 48 (25.7)         | 29 (23.8)       | 45 (21.3)       |               |
| Hypertriglyceridemic, n (%)                              | 45 (6.6)         | 7 (3.7)           | 8 (6.6)         | 7 (3.3)         |               |
| Post-ERCP, n (%)                                         | 10 (1.5)         | 5 (2.7)           | 3 (2.5)         | 9 (4.3)         |               |
| Idiopathic, n (%)                                        | 144 (21.1)       | 40 (21.4)         | 21 (17.2)       | 46 (21.8)       |               |
| Other, n (%)                                             | 67 (9.8)         | 16 (8.6)          | 13 (10.7)       | 19 (9.0)        |               |
| <b>ANAMNESTIC DATA</b>                                   |                  |                   |                 |                 |               |
| AP in the personal history, n (%)                        | 170 (25.9)       | 42 (23.9)         | 29 (25.9)       | 44 (21.6)       | NS            |
| CP in the personal history, n (%)                        | 31 (5.9)         | 7 (4.0)           | 7 (6.3)         | 10 (4.9)        | NS            |
| HT in the personal history, n (%)                        | 345 (54.8)       | 86 (49.4)         | 60 (54.1)       | 101 (54.3)      | NS            |
| HL in the personal history, n (%)                        | 104 (18.2)       | 18 (12.4)         | 10 (10.8)       | 30 (18.5)       | NS            |
| DM in the personal history, n (%)                        | 123 (18.1)       | 23 (12.4)         | 17 (14.1)       | 36 (17.1)       | NS            |
| <b>CCI</b>                                               |                  |                   |                 |                 |               |
| 0, n (%)                                                 | 188 (34.2)       | 57 (37.5)         | 39 (37.1)       | 77 (38.1)       | NS            |
| 1, n (%)                                                 | 155 (28.2)       | 50 (32.9)         | 28 (26.7)       | 44 (21.8)       |               |
| 2, n (%)                                                 | 83 (15.1)        | 21 (13.8)         | 14 (13.3)       | 35 (17.3)       |               |
| ≥3, n (%)                                                | 124 (22.6)       | 24 (15.8)         | 24 (22.9)       | 46 (22.8)       |               |
| <b>Symptoms (Y/N), n (%)</b>                             |                  |                   |                 |                 |               |
| abdominal tenderness, n (%)                              | 591 (88.7)       | 158 (88.3)        | 103 (87.3)      | 163 (81.5)      | NS            |
| abdominal guarding, n (%)                                | 109 (16.4)       | 18 (10.1)         | 12 (10.2)       | 22 (10.1)       | NS            |
| Current smoking (Y/N), n (%)                             | 178 (26.2)       | 50 (26.7)         | 37 (30.6)       | 81 (38.6)       | NS            |
| Cigarettes/day median (Q1-Q3) [n]                        | 15 (10-20) [167] | 20 (10-20) [49]   | 15 (10-20) [36] | 15 (10-20) [74] | 0.981         |
| Pack year median (Q1-Q3) [n]                             | 15 (9-30) [197]  | 19.5 (10-27) [49] | 20 (10-30) [34] | 20 (13-30) [66] | 0.386         |
| Current alcohol (Y/N), n (%)                             | 292 (43.0)       | 90 (48.1)         | 53 (43.4)       | 91 (43.1)       | NS            |
| Amount of alcohol consumption (g/day) median (Q1-Q3) [n] | 50 (25-100)      | 75 (45-106)       | 75 (22-106)     | 100 (50-143)    | 0.867         |

|                                                  |                |                |                  |                |                    |
|--------------------------------------------------|----------------|----------------|------------------|----------------|--------------------|
| <b>MAIN OUTCOMES</b>                             |                |                |                  |                |                    |
| Length of hospital stay median (Q1-Q3) [n]       | 9 (6-13) [682] | 8 (6-13) [170] | 8 (6-12.3) [179] | 8 (6-13) [211] | 0.162              |
| <b>Mortality, n (%)</b>                          | 17 (2.5)       | 5 (2.7)        | 3 (2.5)          | 4 (1.9)        | NS                 |
| <b>Severity of pancreatitis</b>                  |                |                |                  |                |                    |
| Mild, n (%)                                      | 463 (67.9)     | 132 (70.6)     | 86 (70.5)        | 164 (77.7)     | NS                 |
| Moderate, n (%)                                  | 183 (26.8)     | 44 (23.5)      | 28 (23.0)        | 42 (19.9)      |                    |
| Severe, n (%)                                    | 36 (5.3)       | 11 (5.9)       | 8 (6.6)          | 5 (2.4)        |                    |
| All local complication                           | 211 (31.1)     | 56 (29.9)      | 36 (29.5)        | 47 (22.3)      | NS                 |
| Fluid collection n (%)                           | 187 (27.6)     | 50 (26.2)      | 28 (23.0)        | 37 (17.5)      | NS                 |
| Necrosis n (%)                                   | 52 (7.7)       | 24 (12.8)      | 18 (14.8)        | 12 (5.7)       | NS                 |
| Pseudocyst n (%)                                 | 52 (7.7)       | 24 (7.5)       | 18 (5.7)         | 12 (10.4)      | NS                 |
| All systemic complications                       | 56 (8.3)       | 16 (8.7)       | 10 (8.2)         | 12 (5.7)       | NS                 |
| New onset diabetes n (%)                         | 31 (4.6)       | 12 (6.4)       | 7 (5.7)          | 1 (0.5)        | NS                 |
| Renal failure n (%)                              | 19 (2.8)       | 8 (4.3)        | 6 (4.9)          | 3 (1.4)        | NS                 |
| Respiratory failure n (%)                        | 37 (5.5)       | 9 (4.9)        | 6 (5.0)          | 8 (3.8)        | NS                 |
| Heart failure n (%)                              | 15 (2.2)       | 5 (2.7)        | 2 (1.6)          | 1 (0.5)        | NS                 |
| <b>ANALGESIC REQUIREMENT</b>                     |                |                |                  |                |                    |
| Opioid use, n (%)                                | 108 (22.9)     | 19 (15.5)      | 7 (8.9)          | 13 (9.2)       | <b>p&lt;0.001*</b> |
| Number of days with analgesic median (Q1-Q3) [n] | 4 (2-7) [603]  | 4 (2-6) [153]  | 3 (2-6) [103]    | 3 (2-6) [165]  | p=0.13             |
| Number of days with opioid, median (Q1-Q3) [n]   | 2 (1-4) [138]  | 4 (1.5-9) [25] | 2 (1.75-3) [8]   | 2 (1-3) [17]   | p=0.14             |
